# Supplementary material for: The Protective Effects of 18 β ‐Glycyrrhetinic Acid on Imiquimod‐Induced Psoriasis in Mice via Suppression of mTOR/STAT3 Signaling
Source: Hindawi journal article supplement (doi:10.1155/2020/1980456), 2020-01-01
Supplement: f1 [file 1980456.f1.pdf]

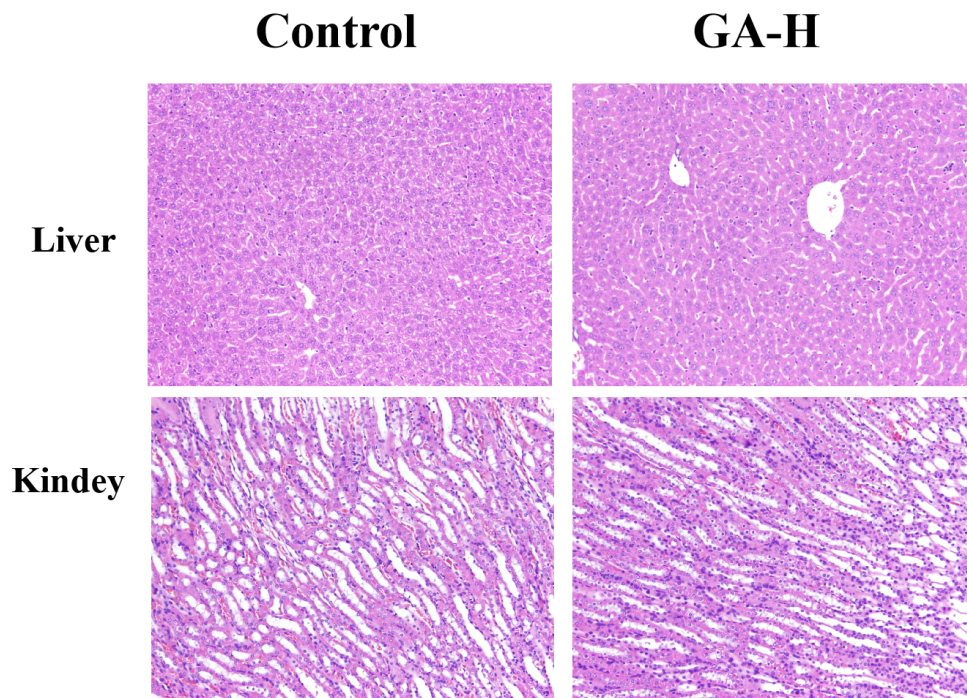

**Figure S1. Histological analysis of liver and kidney after administration with GA .**
